# Supplementary material for: Splenectomy Does Not Improve Survival in Chronic Active Epstein-Barr Virus Disease Patients
Source: Research Square preprint supplement (doi:10.21203/rs.3.rs-7233329/v1), 2025-08-27
Supplement: Supplementary file 1 [file a2adc58a33cc02031a16559d.docx]

| Table S1 Baseline characteristics after propensity score matching | | | | |
| --- | --- | --- | --- | --- |
|  | All patients | Splenectomy | Without splenectomy | P value |
| Gender |  |  |  | 1 |
| Male | 21 | 7 | 14 |
| Female | 27 | 9 | 18 |
| Age | 37.5 | 22.5 | 28 | 0.630 |
| EBV-DNA copies | 3.6E+04 | 4.9E+04 | 2.6E+04 | 0.554 |
| Received Allo-HSCT |  |  |  | 1 |
| Yes | 18 | 6 | 12 |
| No | 30 | 10 | 20 |
| With HLH or not |  |  |  | 1 |
| Yes | 27 | 9 | 18 |
| No | 21 | 7 | 14 |
| HLH: hemophagocytic lymphohistiocytosis | | | | |

Supplemental files
